# Supplementary material for: Ultrafine AuCu nanowires for electrocatalytic nitrogen fixation
Source: Royal Society of Chemistry journal article supplement (doi:10.1039/d3qi01771k), 2023-12-09
Supplement: d3qi01771k1.pdf [file d3qi01771k1.pdf]

Electronic Supplementary Information for

**Ultrafine AuCu nanowires for electrocatalytic nitrogen fixation**

Hongjing Wang, Lin Cui, Songliang Liu, Hongjie Yu, Kai Deng, You Xu, Xiaonian Li,

Ziqiang Wang\* and Liang Wang\*

State Key Laboratory Breeding Base of Green-Chemical Synthesis Technology, College of  
Chemical Engineering, Zhejiang University of Technology, Hangzhou 310014, P. R. China.

**Corresponding authors**

\*E-mails: zqwang@zjut.edu.cn; wangliang@zjut.edu.cn

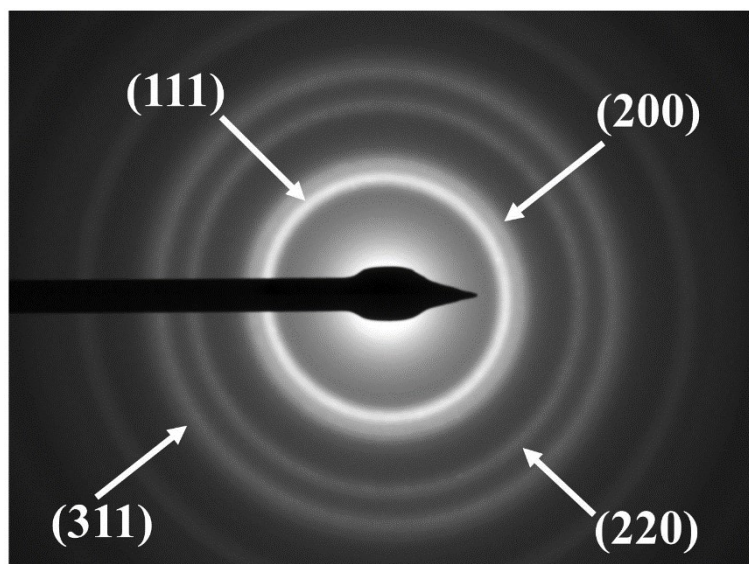

**Fig. S1** SAED pattern of the AuCu NWs.

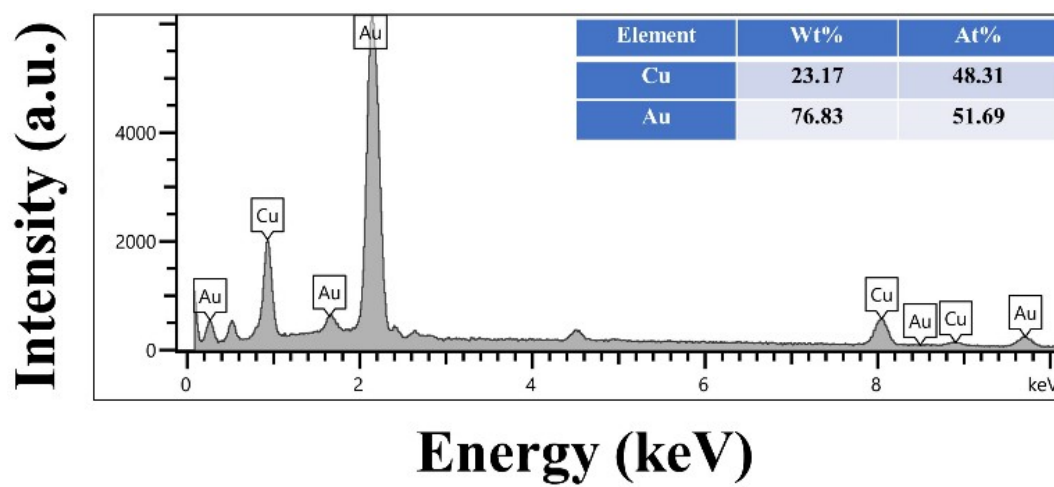

**Fig. S2** The EDX spectrum of the AuCu NWs and corresponding mass and atomic ratios.

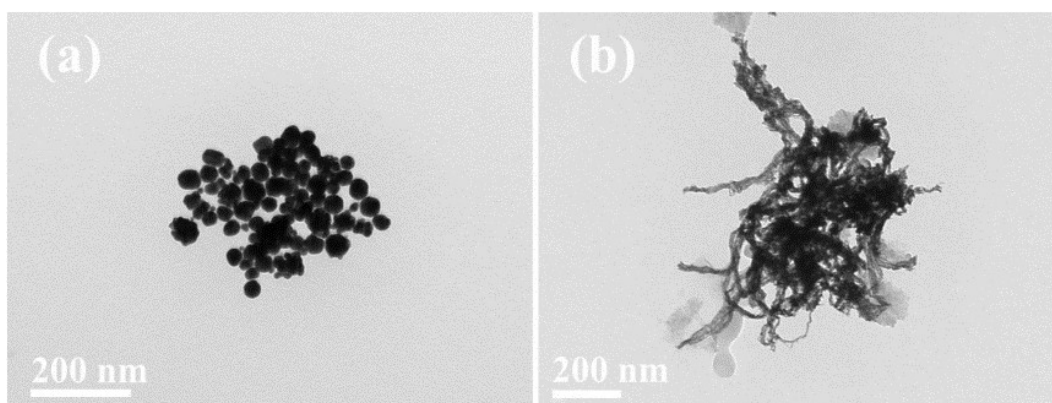

**Fig. S3** TEM images of the samples prepared with (a) 0 mg of 4-aminopyridine and (b) 94 mg of 4-aminopyridine under the typical synthesis conditions.

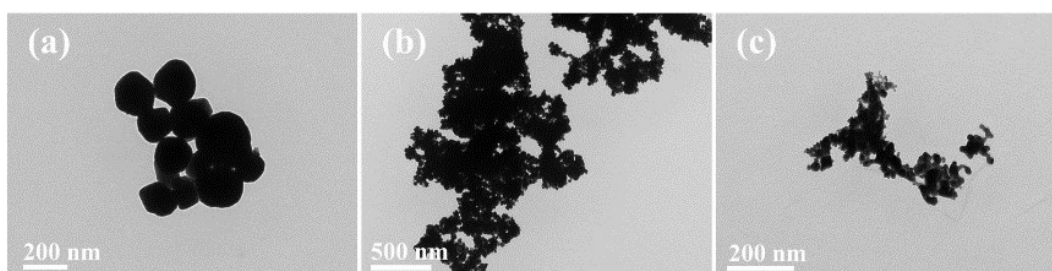

**Fig. S4** TEM images of the samples prepared with (a) DM-970, (b) F127, and (c) PS-b-PMMA under the typical synthesis conditions.

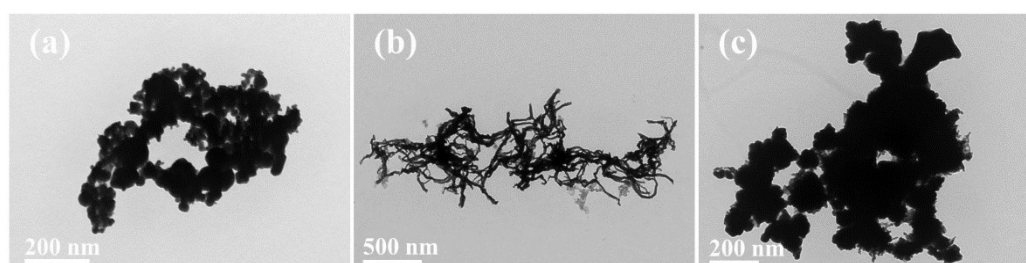

**Fig. S5** TEM images of samples prepared (a) without AA, from (b) HCOOH and (c) glucose under the typical synthesis conditions.

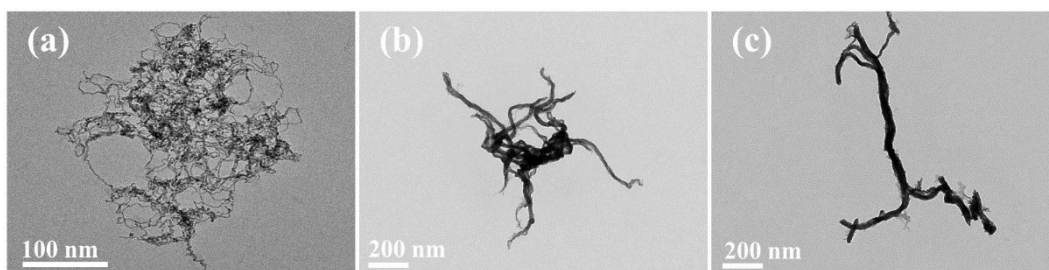

**Fig. S6** TEM images of different samples prepared with different amounts of metal precursors under the same conditions. The amount of added metal precursors for  $\text{HAuCl}_4$  and  $\text{CuCl}_2$  is (a) 2 and 0 mL (Au NWs); (b) 1.5 and 0.5 mL ( $\text{Au}_{1.5}\text{Cu}_{0.5}$  NWs); (c) 0.5 and 1.5 mL ( $\text{Au}_{0.5}\text{Cu}_{1.5}$  NWs).

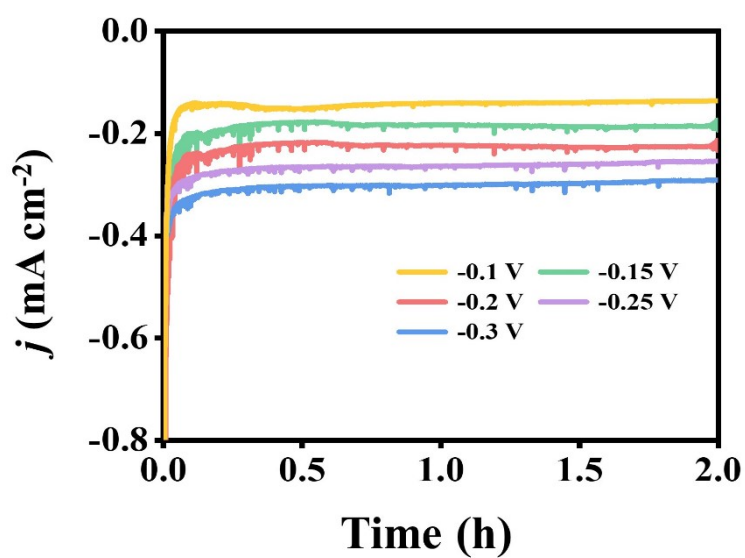

**Fig. S7** Chronoamperometry curves of AuCu NWs for 2 h at selected potentials.

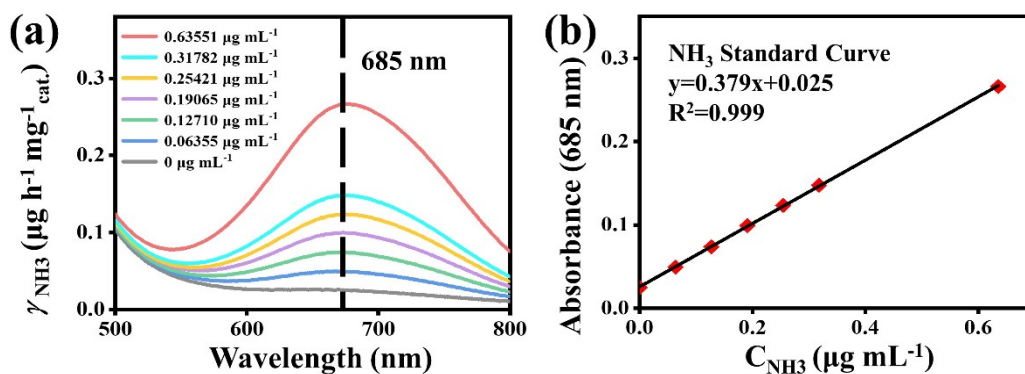

**Fig. S8** (a) UV-vis spectra at various ammonia concentrations after being incubated for 1 h at room temperature, and (b) the corresponding calibration curve.

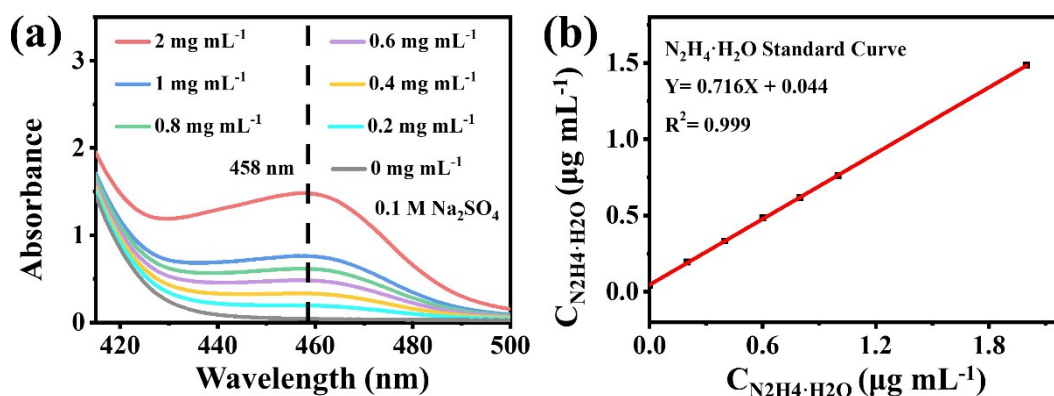

**Fig. S9** (a) UV-vis spectra at various hydrazine concentrations after being incubated for 15 min under ambient conditions, and (b) the corresponding calibration curve.

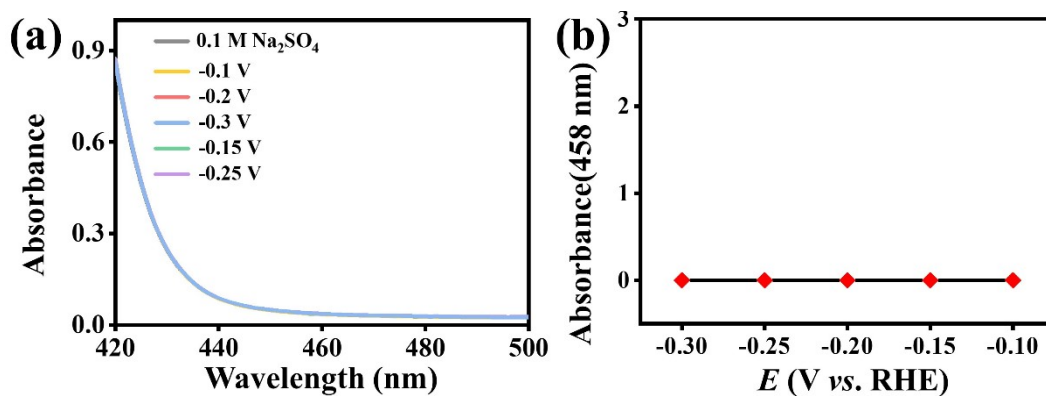

**Fig. S10** (a) UV-vis spectra of the electrolytes after 2 h electrolysis at different potentials, and (b) the  $\text{N}_2\text{H}_4$  concentration of the electrolyte.

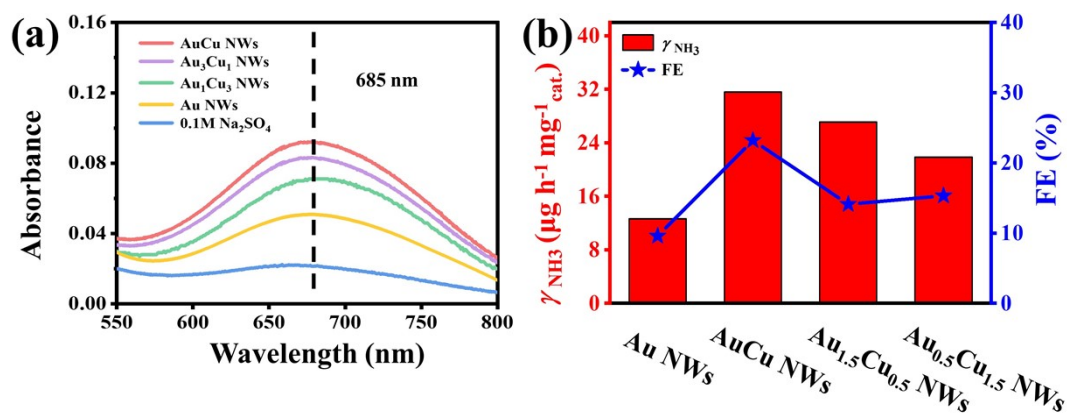

**Fig. S11.** UV-vis absorbance spectra of different samples at  $-0.2$  V, and (b) corresponding  $r_{\text{NH}_3}$  and FE.

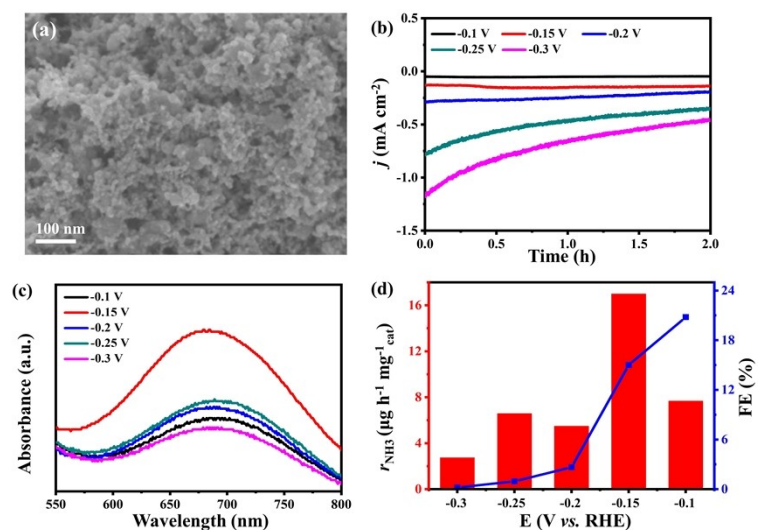

**Fig. S12** SEM image of AuCu NPs (a). The  $i$ - $t$  curve of AuCu NPs at different potentials (b), and corresponding UV-vis absorbance spectra of electrolysis solutions (c) and  $r_{\text{NH}_3}$  and FE (d).

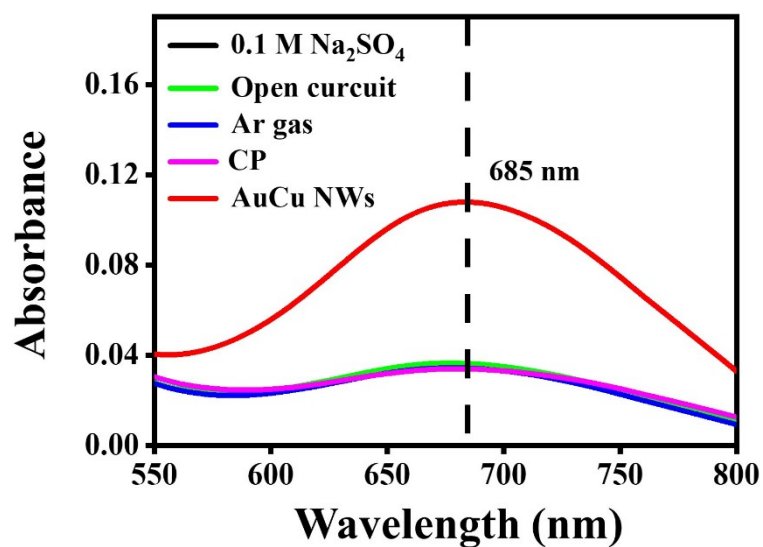

**Fig. S13** UV-vis absorption spectra of electrolytes under different conditions.

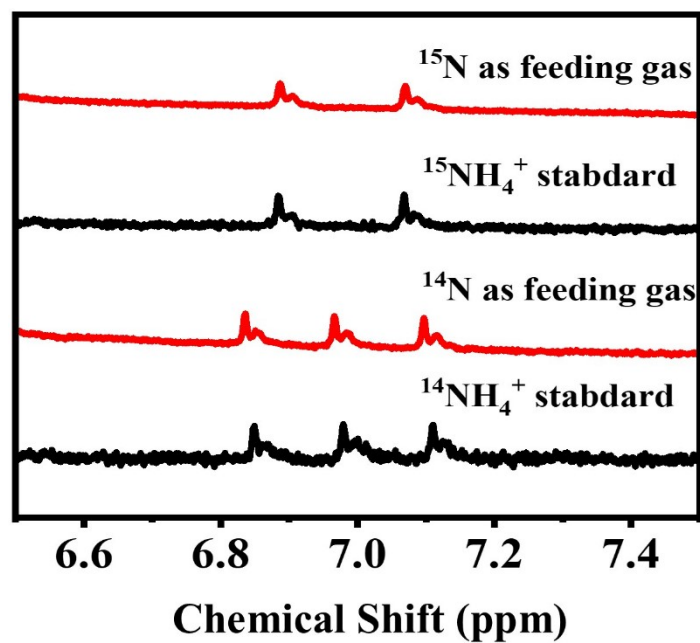

**Fig. S14**  $^1\text{H}$ -NMR spectra of standard  $^{14}\text{NH}_4^+$  and  $^{15}\text{NH}_4^+$  solutions, and the electrolytes produced from the NRR using  $^{14}\text{N}_2$  and  $^{15}\text{N}_2$  as the  $\text{N}_2$  source.

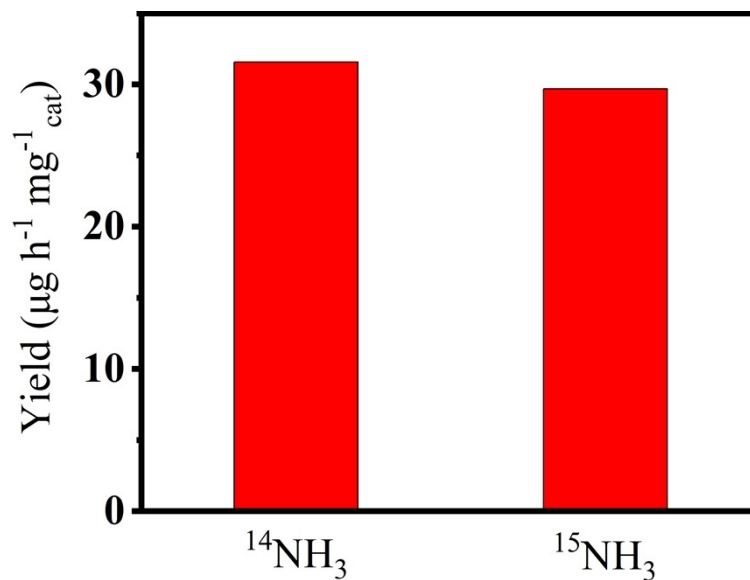

**Fig. S15** The yield of formed  $^{14}\text{NH}_3$  and  $^{15}\text{NH}_4$  using  $^{14}\text{N}_2$  and  $^{15}\text{N}_2$  as the  $\text{N}_2$  source.



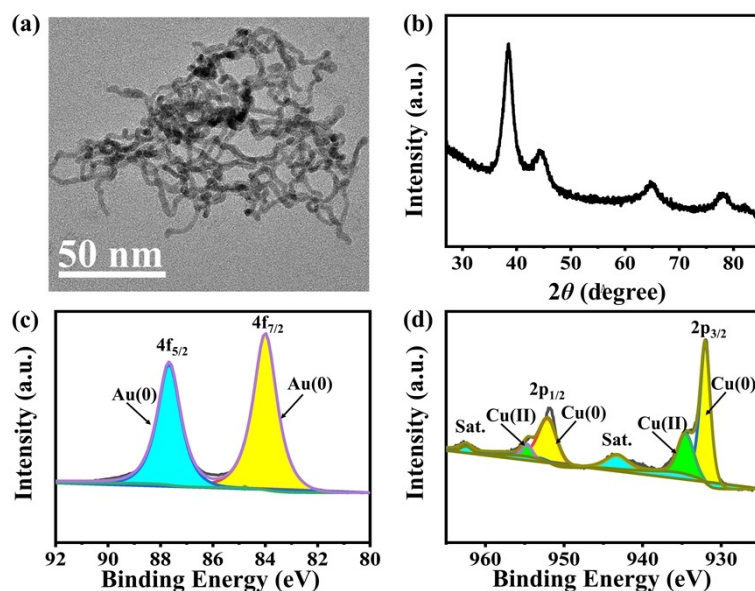

**Fig. S16** TEM image (a), XRD pattern (b) and XPS spectra (c, d) of AuCu NWs after catalytic stability test.

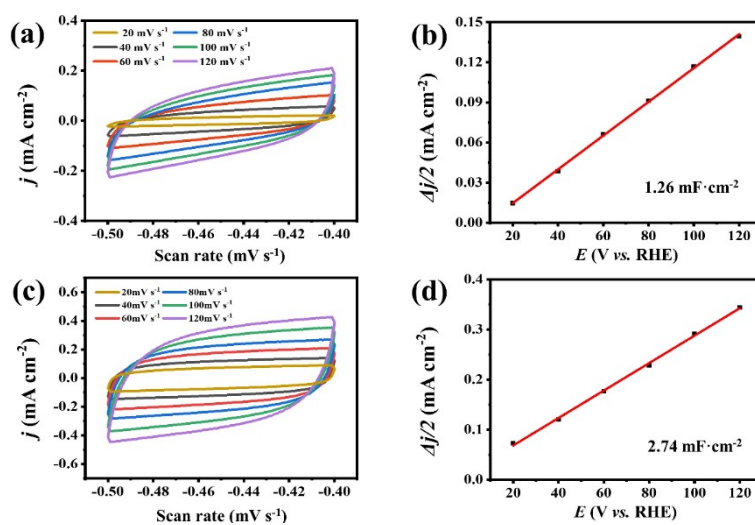

**Fig. S17** CV curves of Au NWs (a) and AuCu NWs (b) in the range of  $-0.40$  and  $-0.50$  V. Capacitive current densities derived from CVs at  $-0.45$  V against scan rates for Au NWs (c) and AuCu NWs (d).

**Table S1** The NRR performance comparisons of the AuCu NWs with the recently reported catalysts under ambient conditions.

| Catalyst                | Electrolyte                               | NH <sub>3</sub> yield                                         | FE (%)      | Ref.             |
|-------------------------|-------------------------------------------|---------------------------------------------------------------|-------------|------------------|
| <b>AuCu NWs</b>         | <b>0.1 M Na<sub>2</sub>SO<sub>4</sub></b> | <b>31.57 μg h<sup>-1</sup> mg<sup>-1</sup><sub>cat.</sub></b> | <b>22.1</b> | <b>This work</b> |
| AuCu/ZIF-8              | 0.1 M Na <sub>2</sub> SO <sub>4</sub>     | 14.50 μg h <sup>-1</sup> mg <sup>-1</sup> <sub>cat.</sub>     | 6.70        | 1                |
| S/Au NWs                | 0.1 M Na <sub>2</sub> SO <sub>4</sub>     | 21.04 μg h <sup>-1</sup> mg <sup>-1</sup> <sub>cat.</sub>     | 15.34       | 2                |
| AuPdP NWs               | 0.1 M Na <sub>2</sub> SO <sub>4</sub>     | 18.78 μg h <sup>-1</sup> mg <sup>-1</sup> <sub>cat.</sub>     | 15.44       | 3                |
| Ag <sub>3</sub> Cu BPNs | 0.1 M Na <sub>2</sub> SO <sub>4</sub>     | 24.59 μg h <sup>-1</sup> mg <sup>-1</sup> <sub>cat.</sub>     | 13.28       | 4                |
| Pd NPs                  | 0.1 M Na <sub>2</sub> SO <sub>4</sub>     | 24.12 μg h <sup>-1</sup> mg <sup>-1</sup> <sub>cat.</sub>     | 9.49        | 5                |
| nPd/NF                  | 0.1 M Na <sub>2</sub> SO <sub>4</sub>     | 18.27 μg h <sup>-1</sup> mg <sup>-1</sup> <sub>cat.</sub>     | 10.36       | 6                |
| AuPd NSs                | 0.1 M Na <sub>2</sub> SO <sub>4</sub>     | 16.9 μg h <sup>-1</sup> mg <sup>-1</sup> <sub>cat.</sub>      | 15.9        | 7                |
| AuCuB PNSs              | 0.1 M Na <sub>2</sub> SO <sub>4</sub>     | 13.2 μg h <sup>-1</sup> mg <sup>-1</sup> <sub>cat.</sub>      | 12.78       | 8                |

## References

1. X.-W. Lv, L. Wang, G. Wang, R. Hao, J.-T. Ren, X. Liu, P. N. Duchesne, Y. Liu, W. Li, Z.-Y. Yuan and G. A. Ozin, ZIF-supported AuCu nanoalloy for ammonia electrosynthesis from nitrogen and thin air, *J. Mater. Chem. A*, 2020, **8**, 8868-8874.
2. H. Wang, D. Yang, S. Liu, S. Yin, H. Yu, Y. Xu, X. Li, Z. Wang and L. Wang, Amorphous sulfur decorated gold nanowires as efficient electrocatalysts toward ambient ammonia synthesis, *ACS Sustainable Chem. Eng.*, 2019, **7**, 19969-19974.
3. H. Wang, D. Yang, S. Liu, S. Yin, Y. Xu, X. Li, Z. Wang and L. Wang, Metal–nonmetal one-dimensional electrocatalyst: AuPdP nanowires for ambient nitrogen reduction to ammonia, *ACS Sustainable Chem. Eng.*, 2019, **7**, 15772-15777.
4. H. Yu, Z. Wang, D. Yang, X. Qian, Y. Xu, H. Wang and L. Wang, Bimetallic Ag<sub>3</sub>Cu porous networks for ambient electrolysis of nitrogen to ammonia, *J. Mater. Chem. A*, 2019, **7**, 12526-12531.
5. G. Deng, T. Wang, A. A. Alshehri, K. A. Alzahrani, Y. Wang, H. Ye, Y. Luo and X. Sun, Improving the electrocatalytic N<sub>2</sub> reduction activity of Pd nanoparticles through surface modification, *J. Mater. Chem. A*, 2019, **7**, 21674-21677.
6. Z. Wang, Z. Dai, H. Yu, H. Zhang, W. Tian, Y. Xu, X. Li, L. Wang and H. Wang, Pore-size-tuned Pd films grown on Ni foam as an advanced catalyst for electrosynthesis of ammonia, *ACS Sustainable Chem. Eng.*, 2020, **8**, 11827-11833.
7. S. Yin, S. Liu, H. Zhang, S. Jiao, Y. Xu, Z. Wang, X. Li, L. Wang and H. Wang, Engineering one-dimensional AuPd nanospikes for efficient electrocatalytic nitrogen fixation, *ACS Appl. Mater. Interfaces*, 2021, **13**, 20233-20239.

8. Z. Wang, J. Niu, Y. Xu, L. Wang, H. Wang and H. Liu, Effects of AuCuB catalysts with porous nanostructures on electrosynthesis of ammonia, *ACS Sustainable Chem. Eng.*, 2020, **8**, 12588-12594.
